# Supplementary material for: Green synthesis of superparamagnetic maghemite nanoparticles using banana pseudo-stem: a reusable heterogeneous catalyst for Fenton-like degradation of tetracycline antibiotics
Source: Royal Society of Chemistry journal article supplement (doi:10.1039/d3nj03747a), 2023-01-01
Supplement: d3nj03747a1.pdf [file d3nj03747a1.pdf]

## Green synthesis of superparamagnetic maghemite nanoparticles using banana pseudo-stem: reusable heterogeneous catalyst for Fenton-like degradation of tetracycline antibiotic

A. Tony Elizabeth<sup>b</sup>, \*E. James,<sup>a</sup> L. Infant Jesan,<sup>a</sup> A. Sebastin Thangadurai<sup>a</sup> and Antonisamy Edwin Vasu<sup>a,\*</sup>

<sup>a</sup> Department of Chemistry, St. Joseph's College (Autonomous), Affiliated to Bharathidasan University, Tiruchirappalli-2. [sjcvasu@gmail.com](mailto:sjcvasu@gmail.com)

<sup>b</sup> Department of Chemistry, Holy Cross College (Autonomous), Affiliated to Bharathidasan University, Tiruchirappalli-2. [ateessjc@gmail.com](mailto:ateessjc@gmail.com)

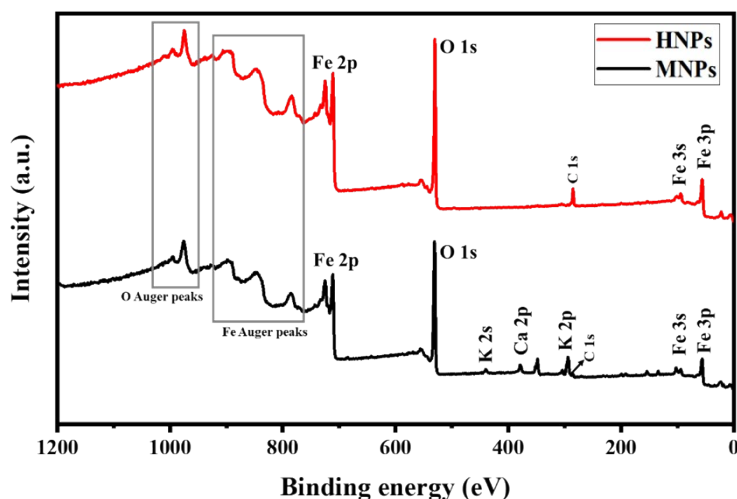

Fig. S1. Full XPS spectra of MNPs and HNPs

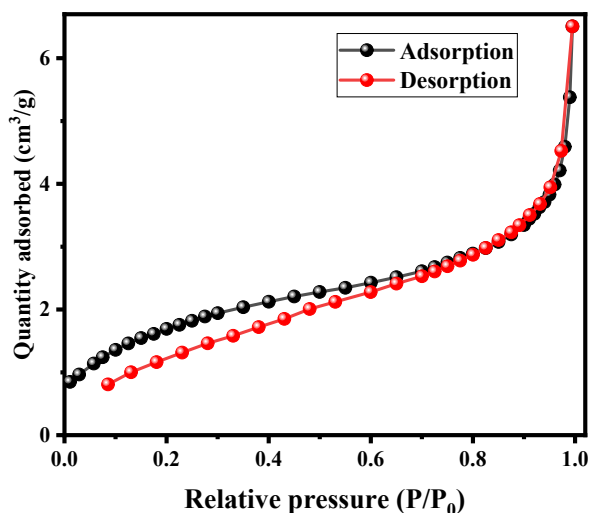

Fig. S2. N<sub>2</sub> adsorption-desorption isotherms of MNPs

**Table S1.** Textural properties of MNPs

| Parameter                                                                                  | Area (m <sup>2</sup> . g <sup>-1</sup> ) |
|--------------------------------------------------------------------------------------------|------------------------------------------|
| Single point surface area at P/P <sub>0</sub> = 0.300157998                                | 5.912                                    |
| BET Surface Area                                                                           | 6.259                                    |
| t-Plot External Surface Area                                                               | 6.921                                    |
| BJH Adsorption cumulative surface area of pores between 1.7000 nm and 300.0000 nm diameter | 4.171                                    |
| D-H Adsorption cumulative surface area of pores between 1.7000 nm and 300.0000 nm diameter | 4.782                                    |

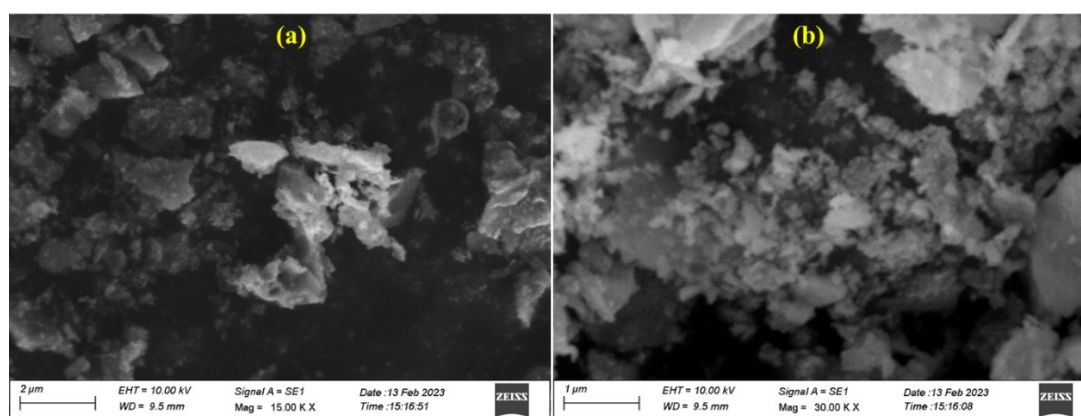

**Fig. S3.** SEM images of MNPs.

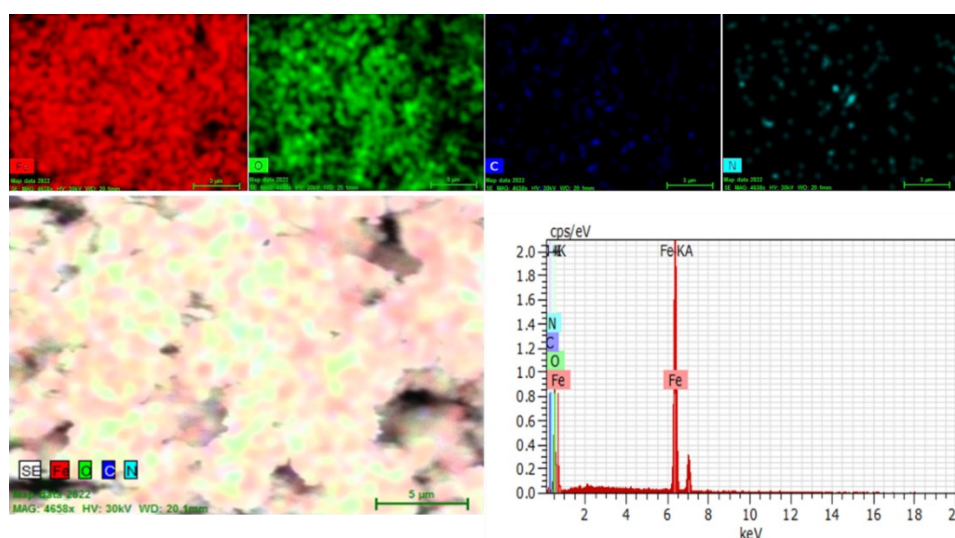

**Fig. S4.** Elemental mapping of MNPs and its EDAX spectrum.

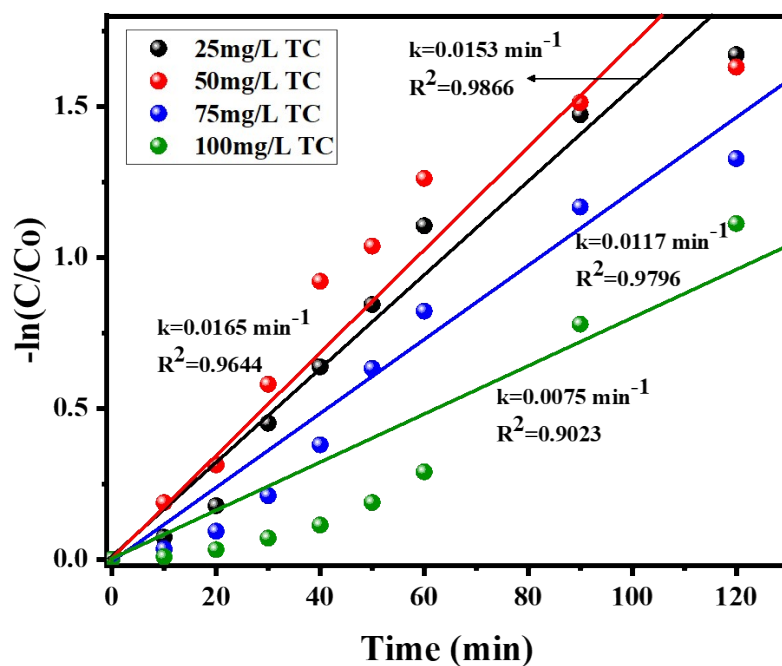

**Fig. S5.** Pseudo-first order kinetic plots for PS assisted degradation of TC activated by MNPs

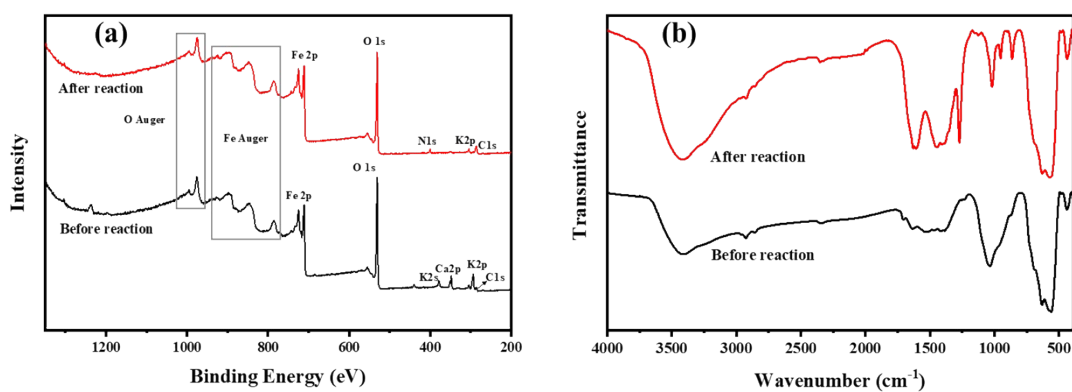

**Fig. S6.** Full XPS scan (a) and FT-IR spectra (b) of MNPs before and after five repeated cycles of operation

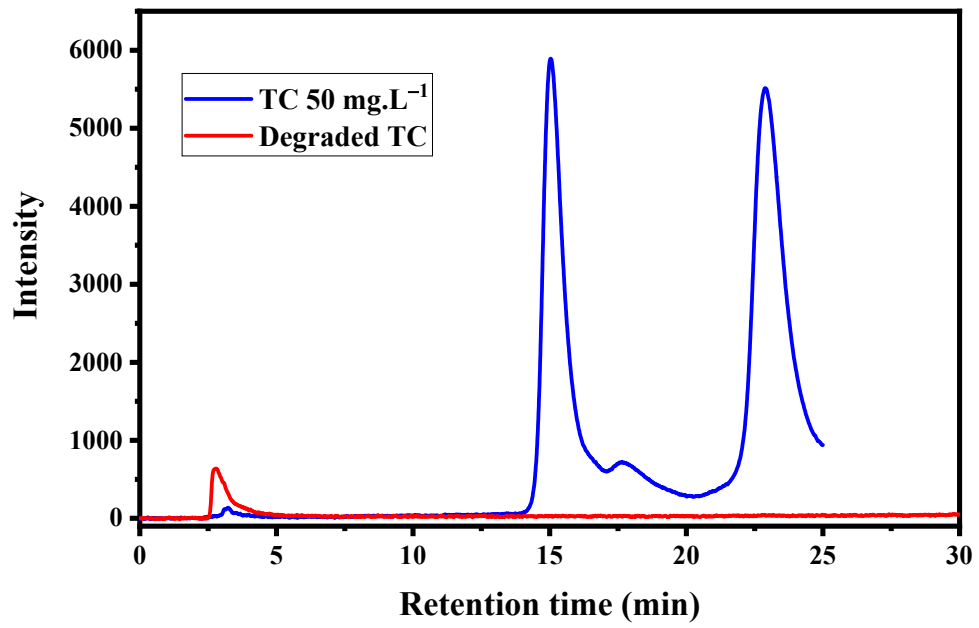

**Fig. S7.** Chromatograms of TC and degraded TC solutions.
